1 **Sublethal  $\beta$ -lactam antibiotics induce PhpP phosphatase expression and**  
2 **StkP kinase phosphorylation in PBP-independent  $\beta$ -lactam antibiotic**  
3 **resistance of *Streptococcus pneumoniae***

4  
5 Yan-Ying Huang<sup>1,2\*</sup>, Yan-Hong Sun<sup>3\*</sup>, Peng Du<sup>1</sup>, Xiao-Xiang Liu<sup>1</sup>, Jie Yan<sup>4,5</sup>, Ai-Hua Sun<sup>1#</sup>

6  
7 <sup>1</sup> Faculty of Basic Medicine, Hangzhou Medical College, Hangzhou, Zhejiang 310053, P.R.  
8 China

9 <sup>2</sup> Department of Pathology, Hangzhou Red Cross Hospital, Hangzhou, Zhejiang 310003, P.R.  
10 China

11 <sup>3</sup> Department of Laboratory Medicine, the Children's Hospital Zhejiang University School of  
12 Medicine, Hangzhou, Zhejiang 310052, P.R. China

13 <sup>4</sup> Division of Basic Medical Microbiology, State Key Laboratory for Diagnosis and Treatment  
14 of Infectious Diseases, the First Affiliated Hospital, Zhejiang University School of Medicine,  
15 Hangzhou, Zhejiang 310003, P.R. China.

16 <sup>5</sup> Department of Medical Microbiology and Parasitology, Zhejiang University School of  
17 Medicine, Hangzhou, Zhejiang 310058, P.R. China

18

19 Running title: Pneumococcal PhpP as a PP2C type protein phosphatase

20

21 \*Authors contributed equally to this work

22

23 # Corresponding author:

24 Ai-Hua Sun, Faculty of Basic Medicine, Hangzhou Medical College, Hangzhou, Zhejiang

25 310053, P.R. China. Phone: +86-571-87692895, E-mail: sunah123@126.com

26

27 E-mail addresses:

28 Yan-Ying Huang: 1842725667@qq.com

29 Yan-Hong Sun: syhsarah1123@163.com

30 Peng Du: pdu1145@163.com

31 Xiao-Xiang Liu: 494957023@qq.com

32 Jie Yan: Med\_bp@zju.edu.cn

33 Ai-Hua Sun: sunah123@126.com

34

## 35 **Abstract**

36 StkP and PhpP of *Streptococcus pneumoniae* have been confirmed to compose a signaling  
37 couple, in which the former is a serine/threonine (Ser/Thr) kinase while the latter was  
38 annotated as a phosphatase. StkP has been reported to be involved in penicillin-binding  
39 protein (PBP)-independent penicillin resistance of *S. pneumoniae*. However, the enzymatic  
40 characterization of PhpP and the role of PhpP in StkP-PhpP couple remain poorly understood.  
41 Here we showed that 1/4 minimal inhibitory concentration (MIC) of penicillin (PCN) or  
42 cefotaxime (CTX), the representatives of  $\beta$ -lactam antibiotics, could induce the expression of  
43 *stkP* and *phpP* genes and phosphorylation of StkP in PCN/CTX-sensitive strain ATCC6306  
44 and three isolates of *S. pneumoniae* (MICs: 0.02-0.5  $\mu\text{g/ml}$ ). The product of *phpP* gene  
45 hydrolyzed PP2C type Ser/Thr phosphatase-specific RRA(pT)VA phosphopeptide substrate  
46 with the  $K_m$  and  $K_{cat}$  values of 277.35  $\mu\text{mol/L}$  and 0.71  $\text{S}^{-1}$ , and the hydrolytic activity was  
47 blocked by sodium fluoride, a PP2C type Ser/Thr phosphatase inhibitor. The phosphorylation  
48 levels of StkP in the four *phpP* gene-knockout ( $\Delta\textit{phpP}$ ) mutants were significantly higher  
49 than that in the wild-type strains. In particular, the MICs of PCN and CTX against the  $\Delta\textit{phpP}$   
50 mutants were significantly elevated as 4-16  $\mu\text{g/ml}$ . Therefore, our findings confirmed that  
51 sublethal PCN and CTX act as environmental inducers to cause the increase of *phpP* and *stkP*  
52 gene expression and StkP phosphorylation. PhpP is a PP2C type Ser/Thr protein phosphatase  
53 responsible for dephosphorylation of StkP. Knockout of the *phpP* gene results in a high level  
54 of StkP phosphorylation and PBP-independent PCN/CTX resistance of *S. pneumoniae*.

## 55 **Importance**

56 *Streptococcus pneumoniae* is a common pathogen in human populations in many countries

57 and areas due to the prevalence of  $\beta$ -lactam antibiotic-resistant pneumococcal strains.  
58 Production of  $\beta$ -lactamases and mutation of penicillin-binding proteins (PBP) have been  
59 considered as the major  $\beta$ -lactam antibiotic-resistant mechanisms in bacteria, but *S.*  
60 *pneumoniae* has not been confirmed to produce any  $\beta$ -lactamases and many pneumococcal  
61 strains present PBP mutation-independent  $\beta$ -lactam antibiotic resistance. StkP is a Ser/Thr  
62 kinase of *S. pneumoniae* to compose a signal-couple with PhpP protein. The present study  
63 demonstrated that the PhpP is a PP2C-type phosphatase for dephosphorylation of StkP and  
64 the sublethal penicillin (PCN) or cefotaxime (CTX) acted as environmental signal molecules  
65 to induce the expression of PhpP. The knockout of PhpP-encoding gene caused the PCN/CTX  
66 resistance generation of PCN/CTX-sensitive pneumococcal strains. All the data indicate that  
67 StkP-PhpP couple of *S. pneumoniae* is involved in PBP mutation-independent  $\beta$ -lactam  
68 antibiotic resistance by phosphorylation of StkP.

69 **Key words:** *Streptococcus pneumoniae*; PhpP; PP2C type protein phosphatase;  
70 StkP-PhpP signaling couple;  $\beta$ -lactam antibiotics; Drug resistance

71

## 72 **Introduction**

73 *Streptococcus pneumoniae* is a major causative agent of bacterial pneumonia and tympanitis  
74 in children [1-3]. More importantly, in the recent years, *S. pneumoniae*-infected meningitis  
75 cases with high fatality have been frequently reported in many countries and areas [4-8].  
76 Therefore, *S. pneumoniae* is a common pathogen for human beings with global importance.

77  $\beta$ -lactam antibiotics are the first choice in clinic to cure *S. pneumoniae*-infected patients  
78 [9]. However, in the recent years,  $\beta$ -lactam antibiotic-resistance of *S. pneumoniae* isolates  
79 from patients is continuously increased and the antimicrobial-resistant *S. pneumoniae* strains  
80 became more epidemic in many countries and areas [10-15], which has been considered as  
81 the major reason for increased incidence of *S. pneumoniae*-infected diseases [15,16].  
82 Bacterial  $\beta$ -lactamases have been confirmed to play a key role in generation of  $\beta$ -lactam  
83 antibiotic resistance in many bacteria including *S. pneumoniae* [17]. Mutation of  
84 penicillin-binding proteins (PBP), the receptors of  $\beta$ -lactam antibiotics located on surface of  
85 bacteria, has been reported as the major  $\beta$ -lactam antibiotic resistant mechanism in bacteria  
86 [18,19]. However, recent studies found that some of the *S. pneumoniae* strains had no PBP  
87 mutation but presented  $\beta$ -lactam antibiotic resistance [20-22], indicating that *S. pneumoniae*  
88 may have a PBP mutation-independent mechanism of  $\beta$ -lactam antibiotic resistance.

89 StkP is a sequence-conserved eukaryotic-type serine/threonine (Ser/Thr) kinase (STK) of  
90 *S. pneumoniae* that has been confirmed to be involved in PBP mutation-independent  
91 penicillin resistance [22]. In the chromosomal DNA of *S. pneumoniae*, StkP-encoding gene  
92 (*stkP*) and *phpP* gene compose a *stkP-phpP* operon and the product of *phpP* gene is  
93 annotated as a putative phosphatase [23,24]. A previous study demonstrated that the PhpP

94 and StkP of *S. pneumoniae* composed a StkP-PhpP signaling couple [25]. It has been reported  
95 that both prokaryotic and eukaryotic STKs are activated through phosphorylation at Ser/Thr  
96 sites and some certain protein phosphatases can inactivate STKs by hydrolysis of phosphoryl  
97 groups at the Ser/Thr residual sites in STKs [26]. In particular, a previous study revealed that  
98 penicillin (PCN) could cause the gene expression profile change of *S. pneumoniae* [27].  
99 Therefore, we presume that  $\beta$ -lactam antibiotics may act as environmental inducers to cause  
100 the change of PhpP and StkP expression and StkP dephosphorylation of *S. pneumoniae* as  
101 well as the PhpP may be involved in the StkP-associated PBP mutation-independent  
102 penicillin resistance by dephosphorylation of StkP.

103 In the present study, we used PCN and cefotaxime (CTX) as the representatives of  
104  $\beta$ -lactam antibiotics to detect their induction of *phpP* and *stkP* gene expression and then  
105 identified the product of *phpP* gene as a PP2C type Ser/Thr protein phosphatase by virtue of  
106 its ability to hydrolyze Ser/Thr phosphatase-specific substrates. Moreover, the *phpP* genes of  
107 *S. pneumoniae* strains were inactivated to determine the role of PhpP in dephosphorylation of  
108 StkP *in vivo* and the change of  $\beta$ -lactam antibiotic resistance. The results of this study  
109 confirmed that the product of *S. pneumoniae phpP* gene is a Ser/Thr protein phosphatase that  
110 involved in  $\beta$ -lactam antibiotic resistance-associated StkP-PhpP signaling couple by StkP  
111 dephosphorylation during induction of sublethal PNC and CTX.

112

## 113 **Materials and Methods**

### 114 **Bacterial strains and culture.**

115 *S. pneumoniae* ATCC6306 and three  $\beta$ -lactam antibiotic-sensitive *S. pneumoniae* isolates  
116 (No.: SP5, SP9 and SP14, belonging to serotype 3, 19F and 19A) from pneumonia children  
117 were kindly provided by the Department of Medical Microbiology and Parasitology, Zhejiang  
118 University School of Medicine. All the strains were cultured with Columbia blood agar  
119 (bioMerieux, France) or 0.5% yeast extract-containing Todd-Hewitt (TH) broth (Sigma, USA)  
120 at 37°C [28]. Besides, *Escherichia coli* EL21DE3 (Novagen, USA) was cultured in  
121 Luria-Bertani (LB) medium (Oxoid, England) at 37°C.

122

### 123 **Animal.**

124 New Zealand white rabbits (3.0 to 3.5 kg per animal) were provided by the Laboratory  
125 Animal Center of Hangzhou Medical College (Certificate No.: SCXK[zhe]2012-0173). All  
126 the animal experimental protocols were approved by the Ethics Committee for Animal  
127 Experiment of Hangzhou Medical College.

128

### 129 **Drug susceptibility test.**

130 Susceptibility of each of the four *S. pneumoniae* strains to PCN or CTX was detected by  
131 E-test (bioMerieux) according to the manufacturer's instruction. The minimal inhibitory  
132 concentrations (MIC) against *S. pneumoniae* strains,  $\leq 2$  or  $\geq 8$   $\mu\text{g/ml}$  of PCN (Sigma) and  $\leq$   
133  $1$  or  $\geq 4$   $\mu\text{g/ml}$  of CTX (Sigma), were considered to be sensitive or resistant [29].

134

135 **Detection of sublethal PCN- and CTX-induced expression of *phpP* and *stkP* genes.**

136 Each of the four *S. pneumoniae* strains was inoculated into TH broth for a 200 rpm shaking  
137 incubation at 37°C. When the value of optical density at 600 nm (OD<sub>600</sub>) of pneumococcal  
138 culture turbidity reached 0.5, 1/4 MIC PCN or CTX was added and then incubated for 0.5, 1,  
139 2, 4, 8 or 12 h as above. After centrifugation and washing with phosphate buffered saline  
140 (PBS), total RNA of each of *S. pneumoniae* strains was extracted using a TRIzol<sup>®</sup> Max<sup>™</sup>  
141 Bacterial RNA Isolation kit (Invitrogen) plus a gDNA Eraser Kit (TaKaRa, China) and then  
142 quantified by ultraviolet spectrophotometry [30]. Subsequently, cDNA from each of the total  
143 RNAs was synthesized using a PrimeScript<sup>™</sup> RT Reagent Kit (TaKaRa). Using each of the  
144 cDNAs as template, the *phpP*- or *stkP*-mRNA level was assessed by real-time fluorescence  
145 quantitative reverse transcription polymerase chain reaction (qRT-PCR) with the primers  
146 P-1F/P-1R or S-1F/S-1R (Table 1) using a SYBR<sup>®</sup> Premix Ex-Taq<sup>™</sup> Kit (TaKaRa) in an ABI  
147 7500 Real-Time PCR System (ABI, USA). The primers used were designed using Primer  
148 Premier 5.0 software according to the *phpP* or *stkP* gene sequences in GenBank (accession  
149 No.: NC\_003098 and NC\_003028). In the qRT-PCR, 16S rRNA gene of *S. pneumoniae* was  
150 used as the internal reference [31], while the PCN- or CTX-untreated *S. pneumoniae* strains  
151 were used as the controls. The obtained qRT-PCR data were analyzed using the  $\Delta\Delta C_t$  model  
152 and randomization test in REST 2005 software [32].

153

154 **Amplification and sequencing of *PhpP* and *stkP* gene segments.**

155 Genomic DNA of each of the four *S. pneumoniae* strains was extracted using a Bacterial  
156 Genomic DNA Preparation Kit (Axygen). By using a High Fidelity PCR Kit (TaKaRa), the



157 entire *phpP* or *stkP* gene segments were amplified from the DNA templates by PCR using the  
158 primers P-2F/P-2R or S-2F/S-2R (Table 1). The PCR products were examined by 1.5%  
159 ethidium bromide-stained agarose gel electrophoresis and then cloned into pMD19-T plasmid  
160 using a T-A Cloning Kit (TaKaRa) to form recombinant pMD19-T<sup>*phpP*</sup> and pMD19-T<sup>*stkP*</sup>  
161 plasmids for sequencing by Invitrogen Co. in Shanghai of China.

162

### 163 **Bioinformatic analysis of *phpP* and *stkP* genes.**

164 Since the nucleotide and amino acid sequence identities of *phpP* and *stkP* genes from the four  
165 *S. pneumoniae* strains were as high as 98.7%-100%, the *phpP* and *stkP* genes of *S.*  
166 *pneumoniae* strain ATCC6306 were analyzed using TMHMM and NCBI Database Conserved  
167 Domain Database (CDD) software [33].

168

### 169 **Generation of prokaryotic expression systems of *phpP* and *stkP* genes.**

170 The pMD19-T<sup>*phpP*</sup> or pMD19-T<sup>*stkP*</sup> plasmid from *S. pneumoniae* strain ATCC6306 and  
171 pET42a vector (Novagen) were digested with both Nde I and Xho I or Nde I and Hind III  
172 (TaKaRa). The recovered *phpP* or *stkP* gene segment was linked with the linearized pET42a  
173 using T4 DNA ligase (TaKaRa) and then transformed into *E. coli* BL21DE3 by CaCl<sub>2</sub>  
174 transformation method to form *E. coli* BL21DE3<sup>pET42a-*phpP*</sup> or *E. coli* BL21DE3<sup>pET42a-*stkP*</sup>. The  
175 engineered strains were cultured in LB medium containing 50 µg/ml kanamycin (Sigma) and  
176 the pET42a-*phpP* and pET42a-*stkP* were extracted from the strains using a Plasmid  
177 Extraction Kit (Axygen) for sequencing again.

178

179 **Expression of *phpP* and *stkP* genes and extraction of expressed products.**

180 The engineered strains, *E. coli* BL21DE3<sup>pET42a-*phpP*</sup> and *E. coli* BL21DE3<sup>pET42a-*stkP*</sup>, were  
181 cultured in kanamycin-containing LB liquid medium to express the target recombinant  
182 proteins (rPhpP and rStkP) under induction of 0.5 mM isopropyl-β-D-thiogalactoside (IPTG,  
183 Sigma). After ultrasonic breakage on ice and a 13,800×g centrifugation for 10 min (4°C), the  
184 supernatants of cultures were collected to extract soluble rPhpP and rStkP using a Ni-NTA  
185 affinity chromatographic column (BioColor, China). The extracted rPhpP or rStkP was  
186 quantified using a BCA Protein Assay Kit (Thermo Scientific, USA). Both the expressed and  
187 extracted rPhpP and rStkP were examined by sodium dodecyl sulfate polyacrylamide gel  
188 electrophoresis (SDS-PAGE) plus a Gel Image Analyzer (Bio-Rad, USA).

189

190 **Preparation of rPhpP-IgG and rStkP-IgG**

191 New Zealand rabbits were intradermally immunized on days 1, 14, 21 and 28 with Freund's  
192 adjuvant-mixed 2 mg rPhpP or rStkP per animal. Fifteen days after the last immunization, the  
193 sera were collected to separate rStkP-IgG or rPhpP-IgG by ammonium sulfate precipitation  
194 plus a DEAE-52 column chromatography using 10 mM phosphate buffer (pH 7.4) for elution  
195 [34]. The titer of rPhpP-IgG or rStkP-IgG binding to rStkP or rPhpP was detected by  
196 immunodiffusion test.

197

198 **Phosphatase activity assays.**

199 The enzymatic activity of rPhpP was detected using a pNPP-Phosphate Assay Kit (BioAssay  
200 Systems, USA) and a PP2C-specific Ser/Thr Phosphatase Assay Kit (Promega, USA) [35,36].

201 Briefly, 0.5, 1, 2.5, 5, 10 or 20  $\mu\text{g}$  rPhpP was mixed with 500 nM para-nitrophenyl phosphate  
202 (p-NPP), an universal Ser/Thr phosphatase substrate, in 100  $\mu\text{l}$  reaction buffer. After a  
203 30-min incubation at 37°C, the OD<sub>405</sub> values reflecting p-NPP hydrolysis were detected using  
204 type M5 spectrophotometer (Bio-Rad). On the other hand, 0.5, 1, 2.5, 5, 10 or 20  $\mu\text{g}$  rPhpP  
205 was mixed with 100  $\mu\text{M}$  RRA(pT)VA phosphopeptide, a PP2C type Ser/Thr protein  
206 phosphatase-specific substrate, in 100  $\mu\text{l}$  reaction buffer. After incubation as above, the OD<sub>600</sub>  
207 values reflecting RRA(pT)VA hydrolysis were detected by spectrophotometry.

208

#### 209 **Phosphatase inhibition test.**

210 Okadaic acid (OA) is an inhibitor of PP1, PP2A and PP2B type Ser/Thr phosphatases while  
211 sodium fluoride (NaF) is a PP2C type Ser/Thr phosphatase inhibitor [37,38]. Briefly, 5  $\mu\text{g}$   
212 rPhpP was mixed with 0.1, 0.5, 1, 5 or 10  $\mu\text{M}$  OA (Sigma) or 0.1, 0.5, 1, 5 or 10 mM NaF  
213 (Sigma) in 100  $\mu\text{l}$  reaction buffer and then incubated at 37°C for 30 min. The activity of OA-  
214 or NaF-treated rPhpP to hydrolyze RRA(pT)VA substrate was detected as described above.

215

#### 216 **Determination of Km and Kcat values.**

217 According to the results of phosphatase activity assays, 5  $\mu\text{g}$  rPhpP was mixed with 50, 100,  
218 150, 200 or 250  $\mu\text{M}$  RRA(pT)VA substrate and then detected by spectrophotometry as  
219 described above. According to the OD<sub>600</sub> values reflecting RRA(pT)VA hydrolysis and free  
220 phosphate concentration standard curve, the Km and Kcat values of rPhpP hydrolyzing the  
221 substrate were calculated by double reciprocal Lineweaver-Burk plot [39].

222

223 **Generation and identification of *phpP* gene-knockout mutant.**

224 pEVP3 plasmid has been used to generate the target gene-knockout mutant of *S. pneumoniae*  
225 [40,41]. Briefly, a 495-bp *phpP* gene segment (*phpP*-495) from *S. pneumoniae* strain  
226 ATCC6306 was amplified using a High Fidelity PCR Kit (TaKaRa) with the primers  
227 P-3F/P-3R and then cloned into pMD19-T to form pMD19-T<sup>*phpP*-495</sup> for sequencing as above.  
228 The pMD19-T<sup>*phpP*-495</sup> and pEVP3 plasmid were digested with both Xho I and BamH I  
229 (TaKaRa). The recovered *phpP*-495 segment was linked with the linearized pEVP3 using T4  
230 DNA ligase (TaKaRa) to form suicide plasmid pEVP3<sup>*phpP*495</sup> for sequencing again. Each of  
231 the four *S. pneumoniae* strains was inoculated in TH broth containing 0.01% CaCl<sub>2</sub> and 0.2%  
232 BSA (Sigma) for a 250-rpm incubation at 37°C to the OD<sub>600</sub> value as 0.25 and then collected  
233 by centrifugation. The competent pneumococcal cells were suspended in 200 µl TH broth  
234 containing 0.01% CaCl<sub>2</sub>, 0.2% BSA and 200 ng/ml competence stimulation peptide (CSP,  
235 AnaSpec, USA) and then added with 200 ng pEVP3<sup>*phpP*-495</sup> for transformation. The mixtures  
236 were smeared on 5% sheet blood Columbia agar (bioMerieux) plates containing 2.5 µg/ml  
237 chloromycin (CM, Sigma) for a 48-h incubation at 37°C in a 5% CO<sub>2</sub> atmosphere to obtain  
238 *phpP* gene-knockout colonies [42]. The strategy for generating *phpP* gene-knockout mutants  
239 ( $\Delta$ *phpP*-6306,  $\Delta$ *phpP*-SP5,  $\Delta$ *phpP*-SP9 and  $\Delta$ *phpP*-SP14) is summarized in Fig. 1.

240

241 **Identification of *phpP* gene-knockout mutants.**

242 Growth of the  $\Delta$ *phpP*-6306,  $\Delta$ *phpP*-SP5,  $\Delta$ *phpP*-SP9 or  $\Delta$ *phpP*-SP14 mutant was assessed by  
243 spectrophotometry. The *phpP* gene knockout in the  $\Delta$ *phpP* mutants was determined by PCR  
244 using the primers P-4F/P-4R and P-5F/P-5R (Table 1) and sequencing of the 5'-*phpP*-pEVP3

245 and pEVP3-3'-*phpP* segment amplification products. Using 1:200 diluted rabbit  
246 anti-rPhpP-IgG as the primary antibody and HRP-conjugated goat anti-rabbit-IgG (Abcam,  
247 USA) as the secondary antibody, Western blot assay was performed to detect the PhpP form  
248 the  $\Delta phpP$  mutants, in which the wild-type strains were used as the controls.

249

#### 250 **Detection of sublethal PCN- or CTX-induced StkP phosphorylation.**

251 The  $\Delta phpP$  mutants and their wild-type strains were treated with 1/4 MIC PCN or CTX for 1,  
252 2, 4 or 8 h at 37°C. After centrifugation and washing with PBS, the pneumococcal pellets  
253 were suspended in deionized water and then ultrasonically broken on ice. The lysates were  
254 centrifuged at 14,000×g for 10 min (4°C) and then the supernatants were collected to detect  
255 protein concentrations using a BCA Protein Assay Kit (Thermo Scientific). 200 µg of each of  
256 the total pneumococcal proteins was mixed with 20 µg rabbit anti-rStkP-IgG for a 2-h  
257 incubation in a 90-rpm rotator (4°C). The mixture was added with 600 µg protein-A-coated  
258 agarose beads (Millipore, USA), followed by a 60-min incubation as above. After a 14,000×g  
259 centrifugation for 5 min and washing thoroughly with PBS, the precipitated beads were  
260 suspended in 200 µl 50 mM Tris-HCl buffer (TB, pH7.5) and then mixed with 200 µl 2M  
261 NaOH solution for a 30-min water-bath at 65°C to release phosphate groups from the  
262 captured StkP according to the instruction of Phosphoprotein Phosphate Detection Kit  
263 (Sangon Biotech, Canada). The mixture was neutralized with 200 µl 4.7 M HCl solution and  
264 then added with 200 µl detection buffer for a 30-min incubation at room temperature. The  
265 OD<sub>620</sub> value reflecting phosphate group concentration released from IgG-captured StkP were  
266 detected using a spectrophotometer (Molecular Devices, USA) [43]. In the detection, the

267 PCN- or CTX-untreated  $\Delta phpP$  mutants and their wild-type strains were used as the controls.

268

269 **Detection of  $\beta$ -lactam antibiotic resistance of  $\Delta phpP$  mutants.**

270 Susceptibility of the  $\Delta phpP$ -6306,  $\Delta phpP$ -SP5,  $\Delta phpP$ -SP9 and  $\Delta phpP$ -SP14 mutants to PCN

271 or CTX was detected by E-test as described above. In the detection, the wild-type *S.*

272 *pneumoniae* strains were used as the controls.

273

274 **Statistical analysis**

275 Data from a minimum of three experiments were averaged and presented as mean  $\pm$  standard

276 deviation (SD). One-way analysis of variance (ANOVA) followed by Dunnett's multiple

277 comparisons test were used to determine significant differences. Statistical significance was

278 defined as  $p < 0.05$ .

279

## 280 **Results**

### 281 **Increase of *stkP*- and *phpP*-mRNA levels induced by sublethal PCN and CTX.**

282 The *phpP*- and *stkP*-mRNA levels of each of the four tested *S. pneumoniae* strains were  
283 relatively lower. When the strains were treated with 1/4 MIC PCN or CTX, the *phpP*- and  
284 *stkP*-mRNA levels were rapidly elevated (Fig. 2A-2D). The data suggested that sublethal  
285 PCN and CTX can act as the stimulators to induce the expression of *S. pneumoniae phpP* and  
286 *stkP* genes.

287

### 288 **Characterization of *phpP* and *stkP* genes.**

289 The product of *S. pneumoniae phpP* or *stkP* gene was predicted as a secretory cytosolic or a  
290 transmembrane protein (Fig. 3A and 3B). The *phpP* gene contains a PP2Cc type protein  
291 phosphatase domain (6-238 aa) with five enzymatic active sites (Fig. 3C). The *stkP* gene  
292 contains a C type STK domain belonging to STKc\_PknB superfamily containing twelve  
293 ATP-binding sites, six dimer interface sites, two activation loops, eight polypeptide  
294 substrate-binding sites and sixteen enzymatic active sites as well as four penicillin-binding  
295 protein and STK-associated (PASTA) superfamily domains (Fig. 3D).

296

### 297 **Effects of expression and extraction of *stkP* and *phpP* genes.**

298 The nucleotide and amino acid sequence identities of *phpP* or *stkP* genes from the four *S.*  
299 *pneumoniae* strains were 99.3%-100% and 99.1%-100% or 99.2%-99.7% and 98.7%-99.9%,  
300 compared to the same two genes in GenBank (accession No.: NC003098) (data not shown).

301 The two engineered strains expressed the target recombinant proteins rPhpP and rStkP,

302 respectively, and the extracted rPhpP or rStkP was showed as a single band in gels (Fig.  
303 4A-4D).

304

### 305 **Powerful Ser/Thr protein phosphatase activity of rPhpP.**

306 The rPhpP from *S. pneumoniae* ATCC6306 hydrolyzed p-NPP, an universal Ser/Thr  
307 phosphatase substrate, and RRA(pT)VA, a PP2C type Ser/Thr protein phosphatase-specific  
308 substrate, with concentration-dependent manners (Fig. 5A). The  $K_m$  and  $K_{cat}$  values of  
309 rPhpP hydrolyzing RRA(pT)VA substrate were 277.35  $\mu\text{mol/L}$  and 0.71  $\text{S}^{-1}$ , respectively (Fig.  
310 5B). Moreover, the PP2C type Ser/Thr protein phosphatase inhibitor NaF, but not the PP1,  
311 PP2A or PP2B type Ser/Thr phosphatase inhibitor OA, inhibited the hydrolytic activity of  
312 rPhpP (Fig. 5C). The data suggested that the product of *S. pneumoniae* *phpP* gene is a PP2C  
313 type Ser/Thr protein phosphatase.

314

### 315 **PCN/CTX-induced StkP phosphorylation and PhpP-caused StkP dephosphorylation.**

316 The  $\Delta\text{phpP}$  mutants could grow persistently in the TH broth similarly to the wild-type strains  
317 (Fig. 6A). The PCR plus sequencing and Western Blot assay confirmed the *phpP* gene  
318 knockout and no PhpP expression in all the four  $\Delta\text{phpP}$  mutants (Fig. 6B and 6C). 1/4 MIC  
319 PCN or CTX could cause the increase of StkP phosphorylation levels in the  $\Delta\text{phpP}$  mutants  
320 and their wild-type strains (Fig. 6D and 6E). However, the  $\Delta\text{phpP}$  mutants presented  
321 significantly higher PCN- or CTX-induced StkP phosphorylation levels than the wild-type  
322 strains (Fig. 6D and 6E). The data suggested that sublethal PCN and CTX can induce  
323 phosphorylation of StkP and PhpP can cause dephosphorylation of StkP *in vivo*.



324

325 **Increased PCN and CTX resistance of  $\Delta phpP$  mutants.**

326 The MICs of PCN and CTX against wild-type ATCC6306, SP5, SP9 and SP14 strains of *S.*  
327 *pneumoniae* were 0.02-0.5  $\mu\text{g/ml}$ , indicating all the strains were sensitive to both PCN and  
328 CTX. However, the MICs of PCN and CTX against the four  $\Delta phpP$  mutants were  
329 significantly elevated as 4-16  $\mu\text{g/ml}$  (Table 2). The data suggested that PhpP is involved in  
330  $\beta$ -lactam antibiotic resistance of *S. pneumoniae*.

## 331 **Discussion**

332 Kinases play key roles in signal transduction in both eukaryotes and prokaryotes and are  
333 activated by either phosphorylation or dephosphorylation [44]. Unlike eukaryotes, histidine  
334 kinases but not serine/threonine/tyrosine (Ser/Thr/Tyr) kinases act as the major signal sensors  
335 and transducers in prokaryotic bacteria [45]. Previous studies confirmed that StkP of *S.*  
336 *pneumoniae* is an eukaryotic-type Ser/Thr protein kinase containing PBP-like domains in its  
337 extracellular region and Ser/Thr phosphorylation sites in its intracellular region [46], and  
338 PhpP and StkP of *S. pneumoniae* compose a StkP-PhpP signaling couple [25]. Operon is a  
339 genic unit for transcription in prokaryotic genome that composed of promoter, operator and  
340 function-associated structural genes [47]. Our bioinformatic analysis showed that PhpP- and  
341 StkP-encoding genes of *S. pneumoniae* are located in the same one operon for co-expression,  
342 implying the close functional association between the two genes. As described in the  
343 introduction, StkP of *S. pneumoniae* is involved in PBP mutation-independent penicillin  
344 resistance [22]. Therefore, the product of *phpP* gene, PhpP, may act as a protein phosphatase  
345 to down-regulate StkP phosphorylation level by dephosphorylation to participate in  
346 StkP-involved  $\beta$ -lactam antibiotic resistance.

347 According to the differences of amino acid sequences and structures, Ser/Thr protein  
348 phosphatases are classified into MPP and PPP families as well as the former contains  $Mg^{2+}$  or  
349  $Mn^{2+}$ -dependent PP2C type phosphatases while the latter includes PP1, PP2A and PP2B type  
350 phosphatases [48]. PP2C type phosphatases has an extensive distribution in bacteria, yeasts,  
351 plants and mammalian cells to play various and complicated functions such as signaling  
352 transduction by dephosphorylation, cellular generation cycle regulation, monitoring DNA

353 damage and RNA splicing [48-50]. Our bioinformatic prediction showed that *phpP* gene of *S.*  
354 *pneumoniae* contains a PP2C type protein phosphatase domain. The recombinant expression  
355 product of *phpP* gene (rPhpP) hydrolyzed both the general Ser/Thr phosphatase substrate  
356 p-NPP and PP2C type Ser/Thr protein phosphatase-specific substrate RRA(pT)VA in a  
357 concentration-dependent manner but its RRA(pT)VA-hydrolyzed ability was blocked by the  
358 PP2C type Ser/Thr protein phosphatase-specific inhibitor NaF. Previous studies confirmed  
359 that StkP and PhpP of *S. pneumoniae* compose a StkP/PhpP signaling couple in which StkP is  
360 activated by Ser/Thr residual phosphorylation and PhpP could hydrolyze phosphoryl groups  
361 in StkP *in vitro* [25,51]. However, we confirmed that the sublethal PCN and CTX induced the  
362 phosphorylation of StkP and the StkP phosphorylation levels in the  $\Delta phpP$  mutants were  
363 significantly higher than that in the wild-type strains. All the data suggested that the product  
364 of *S. pneumoniae phpP* gene is a PP2C type Ser/Thr protein phosphatase to play a reverse  
365 regulation role in StkP/PhpP signaling couple by dephosphorylation of StkP.

366 Previous studies reported that penicillin-binding protein and STK-associated (PASTA)  
367 superfamily domains in some proteins from many Gram-positive bacteria have a potential  
368 ability to bind to  $\beta$ -lactam antibiotics [52,53], and our bioinformatic analysis also revealed  
369 that StkP of *S. pneumoniae* possesses four PASTA domains located its carboxyl terminal,  
370 implying that the StkP may served as the  $\beta$ -lactam antibiotic receptor and  $\beta$ -lactam antibiotics  
371 may cat as environmental activators of StkP-PhpP signaling couple. In the present study, the  
372 sublethal PCN or CTX (1/4 MIC) caused the significant increase of *stkP*- and *phpP*-mRNA  
373 levels and StkP phosphorylation. The data suggested that StkP-PhpP couple is a  $\beta$ -lactam  
374 antibiotic-associated signaling pathway of *S. pneumoniae*.

375 Bacterial PBP is a group of peptidoglycan biosynthesis-associated transpeptidases,  
376 carboxypeptidases and endopeptidases that located on surface of bacteria [54].  $\beta$ -lactam  
377 antibiotics can bind to the peptidases to cause them inactivation by due to enzymatic  
378 molecular allostherism but PBP mutation can cause  $\beta$ -lactam antibiotic resistance due to the  
379 decrease of  $\beta$ -lactam antibiotic-binding ability of PBP [55,56]. However, some *S.*  
380 *pneumoniae* strains presented PBP mutation-independent  $\beta$ -lactam antibiotic resistance  
381 [20-22]. In the present study, all the tested *S. pneumoniae* strains were sensitive to both PCN  
382 and CTX (MICs: 0.02-0.5  $\mu\text{g/ml}$ ). When the *phpP* genes were knockout, the  $\Delta\text{phpP}$  mutants  
383 became resistant to the two antibiotics (MICs: 4-16  $\mu\text{g/ml}$ ). The data imply that StkP  
384 phosphorylation promotes but PhpP-based StkP dephosphorylation inhibits the generation of  
385 PBP mutation-independent  $\beta$ -lactam antibiotic resistance.

386

## 387 **Conclusions**

388 Sublethal PCN and CTX can act as environmental inducers to cause the increase of *stkP* and  
389 *phpP* gene expression and StkP phosphorylation of *S. pneumoniae*. The product of *phpP* gene  
390 is a PP2C type Ser/Thr protein phosphatase to cause dephosphorylation of StkP that plays a  
391 reverse regulating role in StkP/PhpP signaling couple. Sublethal  $\beta$ -lactam antibiotics can act  
392 as environmental inducers of *phpP* and *stkP* gene expression and knockout of *phpP* gene  
393 caused the significant increase of  $\beta$ -lactam antibiotic resistance of *S. pneumoniae*.

394

395

396 **Additional file**

397 This manuscript has no additional files.

398

399 **Abbreviations**

400 *S. pneumoniae*: *Streptococcus pneumoniae*; PNC: penicillin; CTX: cefotaxime; quantitative  
401 reverse transcription polymerase chain reaction: qRT-PCR;  $\Delta phpP$ : *phpP* gene-knockout  
402 mutant; MIC: minimal inhibitory concentration; mRNA: messenger ribonucleic acid; PBP:  
403 penicillin-binding proteins; STK: serine/threonine kinase; DNA: deoxyribonucleic acid; TH:  
404 Todd-Hewitt; LB: Luria-Bertani; OD: optical density; PBS: phosphate buffered saline; RNA:  
405 ribonucleic acid; SDS-PAGE: sodium dodecyl sulfate polyacrylamide gel electrophoresis;  
406 CDD: conserved domain database; IPTG: isopropyl- $\beta$ -D-thiogalactoside; OA: Okadaic acid;  
407 NaF: sodium fluoride; SD: standard deviation; PASTA: penicillin-binding protein and  
408 STK-associated; TB: Tris-HCl buffer.

409

410 **Acknowledgements**

411 We are grateful to Dr. Morrisson (University of Illinois, Chicago, USA) for kindly providing  
412 the pEVP3 plasmid used in this study.

413

414 **Funding**

415 This work was supported by a grant from the National Natural Science Foundation of China  
416 (81772232) and a grant from Zhejiang Provincial Program for the Cultivation of High-Level  
417 Innovative Health Talents (2012-241).

418

### 419 **Availability of data and materials**

420 The datasets analyzed during the current study are available from the corresponding author  
421 on reasonable request.

422

### 423 **Author's contributions**

424 A.H.S. and J.Y. conceived and designed the experiments. Y.Y.H., Y.H.S. and P.D. performed  
425 the experiments. Y.Y.H., Y.H.S. and X.X.L. analyzed the data. Y.Y.H., A.H.S. and J.Y. wrote  
426 the manuscript. A.H.S. obtained the funding. All authors have read and approved the  
427 manuscript.

428

### 429 **Ethics approval and consent to participate**

430 This study has no medical ethic problems. All the animal experimental protocols were  
431 approved by the Ethics Committee for Animal Experiment of Hangzhou Medical College.

432

### 433 **Consent for publication**

434 Not applicable.

435

### 436 **Competing interests**

437 All the authors have no potential conflict of interest to declare.

438

439

## 440 **References**

- 441 1. O'Brien KL, Wolfson LJ, Watt JP, Henkle E, Deloria-Knoll M, McCall N, Lee E,  
442 Mulholland K, Levine OS, Cherian T; Hib and Pneumococcal Global Burden of Disease  
443 Study Team. Burden of disease caused by *Streptococcus pneumoniae* in children younger  
444 than 5 years: global estimates. *Lancet*, 2009;374:893-902.
- 445 2. Yao KH, Yang YH. *Streptococcus pneumoniae* diseases in Chinese children: past, present  
446 and future. *Vaccine*, 2008;26(35):4425-4433.
- 447 3. Henriques-Normark B, Tuomanen EI. The pneumococcus: Epidemiology, microbiology,  
448 and pathogenesis. *Cold Spring Harb Perspect Med*, 2013;3:a010215-010229.
- 449 4. Leimkugel J, Forgor AA, Gagneux S, Pflüger V, Flierl C, Awine E, Naegeli Mn, Dangy  
450 JP, Smith T, Hodgson A, Pluschke G. An outbreak of serotype 1 *Streptococcus*  
451 *pneumoniae* meningitis in Northern Ghana with features that are characteristic of  
452 *Neisseria meningitidis* meningitis epidemics. *J Infect Dis*, 2005;15:192-199.
- 453 5. Chen Y, Deng W, Wang SM, Mo QM, Jia H, Wang Q, Li SG, Li X, Yao BD, Liu CJ,  
454 Zhan YQ, Ji C, Lopez AL, Wang XY. Burden of pneumonia and meningitis caused by  
455 *Streptococcus pneumoniae* in China among children under 5 years of age: A systematic  
456 literature review. *PLoS One*, 2011;6(11):e27333-27341.
- 457 6. Iovino F, Orihuela CJ, Moorlag HE, Molema G, Bijlsma JJE. Interactions between  
458 blood-borne *Streptococcus pneumoniae* and the blood-brain barrier preceding meningitis.  
459 *PLoS One*, 2013;8(7):e68408-68420.
- 460 7. Sfaihi L, Kamoun F, Kamoun T, Aloulou H, Mezghani S, Hammemi A, Hachicha M.  
461 Bacterial meningitis in children: epidemiological data and outcome. *Tunis Med*, 2014;

- 462 92(2):141-146.
- 463 8. Brink M, Welinder-Olsson C, Hagberg L. Time window for positive cerebrospinal fluid  
464 broad-range bacterial PCR and *Streptococcus pneumoniae* immunochromatographic test  
465 in acute bacterial meningitis. *Infect Dis*, 2015;47:869-877.
- 466 9. Felmingham D, Cantón R, Jenkins SG. Regional trends in beta-lactam, macrolide,  
467 fluoroquinolone and telithromycin resistance among *S. pneumoniae* isolates 2001-2004. *J*  
468 *Infect*, 2007;55(2):111-118.
- 469 10. Song JH, Jung SI, Ko KS. High prevalence of antimicrobial resistance among clinical  
470 *Streptococcus pneumoniae* isolates in Asia. *Antimicrob Agents Chemother*, 2004;  
471 48:2101-2107.
- 472 11. Yang F, Xu XG, Yang MJ, Zhang YY, Klugman KP, McGee L. Antimicrobial  
473 susceptibility and molecular epidemiology of *Streptococcus pneumoniae* isolated from  
474 Shanghai, China. *Int J Antimicrob Agents*, 2008;32(5):386-391.
- 475 12. Kumarasamy KK, Toleman MA, Walsh TR, et al. Emergence of a new antibiotic  
476 resistance mechanism in India, Pakistan, and the UK: a molecular, biological, and  
477 epidemiological study. *Lancet Infect Dis*, 2010;10:597-602.
- 478 13. Hackel M, Lascols C, Bouchillon S, Hilton B, Morgenstern D, Purdy J. Serotype  
479 prevalence and antibiotic resistance in *Streptococcus pneumoniae* clinical isolates among  
480 global populations. *Vaccine*, 2013;31(42):4881-4887.
- 481 14. Moujaber GE, Osman M, Rafei R, Dabboussi F, Hamze M. Molecular mechanisms and  
482 epidemiology of resistance in *Streptococcus pneumoniae* in the Middle East region. *J*  
483 *Med Microbiol*, 2017;66:847-858.
- 484 15. Jacobs MR. Antimicrobial-resistant *Streptococcus pneumoniae*: trends and management.  
485 *Expert Rev Anti Infect Ther*, 2008;6(5):619-635.



- 486 16. Huang S, Liu X, Lao W, Zeng S, Liang H, Zhong R, Dai X, Wu X, Li H, Yao Y. Serotype  
487 distribution and antibiotic resistance of *Streptococcus pneumoniae* isolates collected at a  
488 Chinese hospital from 2011 to 2013. BMC Infect Dis, 2015;15(1):312-322.
- 489 17. Amin AN, Cerceo EA, Deitelzweig SB, Pile JC, Rosenberg DJ, Sherman BM. The  
490 hospitalist perspective on treatment of community-acquired bacterial pneumonia.  
491 Postgrad Med, 2014;126(2):18-29.
- 492 18. Contreras-Martel C, Dahout-Gonzalez C, Martins ADS, Ados S, Kotnik M, Dessen A.  
493 PBP active site flexibility as the key mechanism for  $\beta$ -lactam resistance in pneumococci.  
494 J Mol Biol, 2009;387(4):899-909.
- 495 19. Albarracin-Orio AG, Pinas GE, Cortes PR, et al. Compensatory evolution of pbp  
496 mutations restores the fitness cost imposed by beta-lactam resistance in *Streptococcus*  
497 *pneumoniae*. PLoS Pathog, 2011;7(2):e1002000-1002033.
- 498 20. Chesnel L, Carapito R, Croizé J, Dideberg O, Vernet T, Zapun A. Identical  
499 penicillin-binding domains in penicillin-binding proteins of *Streptococcus pneumoniae*  
500 clinical isolates with different levels of beta-lactam resistance. Antimicrob Agents  
501 Chemother. 2005;49(7):2895-2902.
- 502 21. Hakenbeck R, Brückner R, Denapate D, Maurer P. Molecular mechanisms of  $\beta$ -lactam  
503 resistance in *Streptococcus pneumoniae*. Future Microbiol, 2012;7(3):395-410.
- 504 22. Dias R, Félix D, Canica M, Trombe MC. The highly conserved serine threonine kinase  
505 StkP of *Streptococcus pneumoniae* contributes to penicillin susceptibility independently  
506 from genes encoding penicillin-binding proteins. BMC Microbiol, 2009;9(5):121-129.
- 507 23. Tettelin H, Nelson KE, Paulsen IT, Eisen JA, Read TD, Peterson S, Heidelberg J, DeBoy

- 508 RT, Haft DH, Dodson RJ, Durkin AS, Gwinn M, Kolonay JF, Nelson WC, Peterson JD,  
509 Umayam LA, White O, Salzberg SL, Lewis MR, Radune D, Holtzapple E, Khouri H,  
510 Wolf AM, Utterback TR, Hansen CL, McDonald LA, Feldblyum TV, Angiuoli S,  
511 Dickinson T, Hickey EK, Holt IE, Loftus BJ, Yang F, Smith HO, Venter JC, Dougherty  
512 BA, Morrison DA, Hollingshead SK, Fraser CM. Complete genome sequence of a  
513 virulent isolate of *Streptococcus pneumoniae*. *Science*, 2001;293(5529):498-506.
- 514 24. Hoskins JA, Alborn W Jr., Arnold J, Blaszcak L, Burgett S, DeHoff BS, Estrem S, Fritz  
515 L, Fu DJ, Fuller W, Geringer C, Gilmour R, Glass JS, Khoja H, Kraft A, LaGace R,  
516 LeBlanc DJ, Lee LN, Lefkowitz EJ, Lu J, Matsushima P, McAhren S, McHenney M,  
517 McLeaster K, Mundy C, Nicas TI, Norris FH, O’Gara M, Peery R, Robertson GT,  
518 Rockey P, Sun PM, Winkler ME, Yang Y, Young-Bellido M, Zhao G, Zook C, Baltz RH,  
519 Jaskunas S. Richard, Rosteck PR Jr, Skatrud PL, Glass JI. Genome of the bacterium  
520 *Streptococcus pneumoniae* strain R6. *J Bacteriol*, 2001;183 (19):5709-5717.
- 521 25. Osaki M, Arcondéguy T, Bastide A, Touriol C, Prats H, Trombe MC. The StkP/PhpP  
522 signaling couple in *Streptococcus pneumoniae*: cellular organization and physiological  
523 characterization. *J Bacteriol*, 2009;191(15):4943-4950.
- 524 26. Beier D, Gross R. Regulation of bacterial virulence by two-component systems. *Curr*  
525 *Opin Microbiol*, 2006, 9(2):143-152.
- 526 27. Rogers PD, Liu TT, Barker KS, Hilliard GM, English BK, Thornton J, Swiatlo E,  
527 McDaniel LS. Gene expression profiling of the response of *Streptococcus pneumoniae* to  
528 penicillin. *J Antimicrob Chemother*, 2007;59(4):616-626.
- 529 28. Hesje CK, Drlica K, Blondeau JM. Mutant prevention concentration of tigecycline for

- 530 clinical isolates of *Streptococcus pneumoniae* and *Staphylococcus aureus*. J Antimicrob  
531 Chemother, 2015;70: 494-497.
- 532 29. National Committee for Clinical Laboratory Standards (NCCLS). Performance standards  
533 for antimicrobial susceptibility testing. 25th informational supplement (M100-S25),  
534 Wayne: NCCLS, PA, USA, 2015.
- 535 30. Zhang L, Zhang CL, Ojcius DM, Sun D, Zhao JF, Lin XA, Li LW, Li LJ, Yan J. The  
536 mammalian cell entry (Mce) protein of pathogenic *Leptospira* species is responsible for  
537 RGD motif-dependent infection of cells and animals. Mol Microbiol, 2012;  
538 83(5):1006-1023.
- 539 31. El Aila NA, Emler S, Kaijalainen T, De Baere T, Saerens B, Alkan E, Deschaght  
540 P, Verhelst R, Vaneechoutte M. The development of a 16S rRNA gene based PCR for the  
541 identification of *Streptococcus pneumoniae* and comparison with four other species  
542 specific PCR assays. BMC Infect Dis, 2010;10:104-112.
- 543 32. Pfaffl MW, Horgan GW, Dempfle L. Relative expression software tool (REST) for  
544 group-wise comparison and statistical analysis of relative expression results in real-time  
545 PCR. Nucleic Acids Res, 2002;30(9):e36-46.
- 546 33. Marchler-Bauer A, Lu S, Anderson JB, Chitsaz F, Derbyshire MK, DeWeese-Scott C,  
547 Fong JH, Geer LY, Geer RC, Gonzales NR, Gwadz M, Hurwitz DI, Jackson JD, Ke Z,  
548 Lanczycki CJ, Lu F, Marchler GH, Mullokandov M, Omelchenko MV, Robertson CL,  
549 Song JS, Thanki N, Yamashita RA, Zhang D, Zhang N, Zheng C, Bryant SH. CDD: a  
550 Conserved Domain Database for the functional annotation of proteins. Nucleic Acids Res,  
551 2011;39:D225-D229.

- 552 34. Wang H, Wu YF, Ojcius DM, Yang XF, Zhang CL, Ding SB, Lin XA, Yan J. Leptospiral  
553 hemolysins induce proinflammatory cytokines through Toll-like receptor 2- and  
554 4-mediated JNK and NF- $\kappa$ B signaling pathways. PLoS One, 2012;7(8):e42266-42280.
- 555 35. Lee, SW, Jeong KS, Han SW, Lee SE, Phee BK, Hahn TR, Ronald P. The *Xanthomonas*  
556 *oryzae* pv. *oryzae* PhoPQ two-component system is required for AvrXA21 activity, *hrpG*  
557 expression, and virulence. J Bacteriol, 2008;190(6):2183-2197.
- 558 36. Treuner-Lange A, Ward MJ, Zusman DR. Pph1 from *Myxococcus xanthus* is a protein  
559 phosphatase involved in vegetative growth and development. Mol Microbiol, 2001;  
560 40(1):126-140.
- 561 37. Garcia L, Garcia F, Llorens F, Unzeta M, Itarte E, Gómez N. PP1/PP2A phosphatases  
562 inhibitors okadaic acid and calyculin A block ERK5 activation by growth factors and  
563 oxidative stress. FEBS Lett, 2002;523(1-3):90-94.
- 564 38. Marley AE, Sullivan JE, Carling D, Abbott WM, Smith GJ, Taylor IW, Carey F, Beri RK.  
565 Biochemical characterization and deletion analysis of recombinant human protein  
566 phosphatase 2C. Biochem J, 1996;320(Pt3):801-806.
- 567 39. Kassegne K, Hu WL, Ojcius DM, Sun D, Ge YM, Zhao JF, Yang XF, Li LJ, Yan J.  
568 Identification of collagenase as a critical virulence factor for invasiveness and  
569 transmission of pathogenic *Leptospira species*. J Infect Dis, 2014;209(7):1105-1115.
- 570 40. Pestova EV, Morrison DA. Isolation and characterization of three *Streptococcus*  
571 *pneumoniae* transformation-specific loci by use of a *lacZ* reporter insertion vector. J  
572 Bacteriol, 1998;180(10):2701-2710.
- 573 41. Thanassi JA, Hartman-Neumann SL, Dougherty TJ, Dougherty BA, Pucci MJ.

- 574 Identification of 113 conserved essential genes using a high-throughput gene disruption  
575 system in *Streptococcus pneumoniae*. Nucleic Acids Res, 2002;30(14):3152-3162.
- 576 42. Contreras-Martel C, Dahout-Gonzalez C, Martins-Ados S, Kotnik M, Dessen A. PBP  
577 active site flexibility as the key mechanism for beta-lactam resistance in pneumococci. J  
578 Mol Biol, 2009;387(4):899-909.
- 579 43. Fruehling S, Longnecker R. In *vitro* assays for the detection of protein tyrosine  
580 phosphorylation and protein tyrosine kinase activities. Methods Mol Biol, 2001;  
581 174:337-343.
- 582 44. Kumar R, Deivendran S, Santhoshkumar TR, Pillai MR. Signaling coupled epigenomic  
583 regulation of gene expression. Oncogene, 2017;36(43):5917-5926.
- 584 45. Khorchid A, Mkura M. Bacterial histidine kinase as signal sensor and transducer. Int J  
585 Biochem Cell Biol, 2006;38(3):307-312.
- 586 46. Giefing C, Jelencsics KE, Gelbmann D, Senn BM, Nagy E. The pneumococcal  
587 eukaryotic-type serine/threonine protein kinase StkP co-localizes with the cell division  
588 apparatus and interacts with FtsZ *in vitro*. Microbiology, 2010;156(6):1697-1707.
- 589 47. Cherry L. Genome size and operon content. J Theror Biol, 2003;221(3):401-410.
- 590 48. Das AK, Helps NR, Cohen PT, Barford D. Crystal structure of the protein  
591 serine/threonine phosphatase 2C at 2.0 A resolution. EMBO J, 1996;15 (24):6798-6809.
- 592 49. Schweighofer A, Hirt H, Meskiene I. Plant PP2C phosphatases: emerging functions in  
593 stress signaling. Trends Plant Sci, 2004;9(5):236-243.
- 594 50. Rajagopal L, Clancy A, Rubens CE. A eukaryotic type serine/threonine kinase and  
595 phosphatase in *Streptococcus agalactiae* reversibly phosphorylate an inorganic  
596 pyrophosphatase and affect growth, cell segregation, and virulence. Biol Chem J, 2003;  
597 278(16):14429-14441.

- 598 51. Nováková L, Sasková L, Pallová P, Janeček J, Novotná J, Ulrych A, Echenique J, Trombe  
599 MC, Branny P. Characterization of a eukaryotic type serine/threonine protein kinase and  
600 protein phosphatase of *Streptococcus pneumoniae* and identification of kinase substrates.  
601 FEBS J, 2005;272(5):1243-1254.
- 602 52. Yeats C, Finn RD, Bateman A. The PASTA domain: a  $\beta$ -lactam-binding domain. Trends  
603 Biochem Sci, 2002;27(9):438-440.
- 604 53. Maestro B, Nováková L, Heseck D, Lee M, Leyva E, Mobashery S, Sanz JM, Branny P.  
605 Recognition of peptidoglycan and  $\beta$ -lactam antibiotics by extracellular domain of the  
606 Ser/Thr protein kinase StkP from *Streptococcus pneumoniae*. FEBS Lett, 2011;  
607 585(2):357-363.
- 608 54. Sauvage E, Kerff F, Terrak M, Ayala JA, Charlier P. The penicillin-binding proteins:  
609 Structure and role in peptidoglycan biosynthesis. FEMS Microbiol Rev,  
610 2008;32:234-258.
- 611 55. Macheboeuf P, Contreras-Martel C, Job V, Dideberg O, Dessen A. Penicillin binding  
612 proteins: Key players in bacterial cell cycle and drug resistance processes. FEMS  
613 Microbiol Rev, 2006;30:673-691.
- 614 56. Zapun A, Contreras-Martel C, Vernet T. Penicillin-binding proteins and  $\beta$ -lactam  
615 resistance. FEMS Microbiol Rev, 2008;32:361-385.  
616

## 617 **Legend**

618 Fig. 1 Strategy for generation of *S. pneumoniae*  $\Delta$ *phpP* mutant. See section of materials and  
619 methods in text for details.

620

621 Fig. 2 Increase of *phpP*- and *stkP*-mRNAs after treatment with sublethal PCN and CTX.

622 (A). Increase of *phpP*-mRNA induced by 1/4 MIC PCN, detected by qRT-PCR. Bars show  
623 the mean  $\pm$  SD of three independent experiments. The *phpP*-mRNA levels in the  
624 PCN-untreated *S. pneumoniae* strains (before treatment) were set as 1.0. \*:  $p < 0.05$  vs the  
625 *phpP*-mRNA levels in the PCN-untreated strains.

626 (B). Increase of *phpP*-mRNA induced by 1/4 MIC CTX, detected by qRT-PCR. The legend is  
627 the same as shown in A but for CTX-induced *phpP*-mRNA detection.

628 (C). Increase of *stkP*-mRNA induced by 1/4 MIC PCN, detected by qRT-PCR. Bars show the  
629 mean  $\pm$  SD of three independent experiments. The *stkP*-mRNA levels in the PCN-untreated *S.*  
630 *pneumoniae* strains (before treatment) were set as 1.0. \*:  $p < 0.05$  vs the *stkP*-mRNA levels in  
631 the PCN-untreated strains.

632 (B). Increase of *stkP*-mRNA induced by 1/4 MIC of CTX, detected by qRT-PCR. The legend  
633 is the same as shown in C but for CTX-induced *stkP*-mRNA detection.

634

635 Fig. 3 Predicted characteristics of *S. pneumoniae* *phpP* and *stkP* genes.

636 (A). Structure and location of *phpP* gene product, predicted using TMHMM software.

637 (B). Structure and location of *stkP* gene product, predicted using TMHMM software.

638 (C). PP2C type phosphatase domain in *phpP* gene product (PhpP), predicted using NCBI

639 Database CDD software.

640 (D). STK and PASTA domains in *stkP* gene product (StkP), predicted using NCBI Database  
641 CDD software.

642

643 Fig. 4 Amplification and expression of *S. pneumoniae phpP* and *stkP* genes.

644 (A). Amplification fragments of *phpP* genes from *S. pneumoniae* strains, determined by PCR.

645 Lane M: DNA marker. Lanes 1-4: amplicons of *phpP* genes from *S. pneumoniae* strains  
646 ATCC6306, SP5, SP9 and SP14 (738 bp). Lane 5: blank control.

647 (B). Amplification fragments of *stkP* genes from *S. pneumoniae* strains, determined by PCR.

648 The legend is the same as shown in A but for *stkP* gene amplification (1977 bp).

649 (C). Expression and extraction effects of rPhpP, detected by SDS-PAGE. Lane M: protein  
650 marker. Lane 1: wild-type *E. coli* BL21DE3. Lane 2: the expressed rPhpP (~28.3 kDa). Lane  
651 3: the extracted rPhpP by Ni-NTA affinity chromatography.

652 (D). Expression and extraction effects of rStkP, detected by SDS-PAGE. The legend is the  
653 same as shown in C but for rStkP expression and extraction (~75.8 kDa).

654

655 Fig. 5 Powerful protein phosphatase activity of rPhpP from *S. pneumoniae*.

656 (A). Ability of rPhpP hydrolyzing phosphatase substrates p-NPP and RRA(pT)VA,  
657 determined by spectrophotometry. Bars show the means  $\pm$  SD of three independent  
658 experiments. p-NPP is a universal Ser/Thr phosphatase substrate while RRA(pT)VA is a  
659 PP2C type Ser/Thr protein phosphatase-specific substrate.

660 (B). Km and Kcat values of rPhpP hydrolyzing RRA(pT)VA substrate, determined by



661 spectrophotometry. 5  $\mu$ g rPhpP and 50, 100, 150, 200 or 250  $\mu$ M RRA(pT)VA  
662 phosphopeptide were used.

663 (C). Enzymatic activity of rPhpP after treatment with phosphatase inhibitors, determined by  
664 spectrophotometry. NaF is a PP2C type Ser/Thr protein phosphatase inhibitor while OA is an  
665 inhibitor of PP1, PP2A or PP2B type Ser/Thr phosphatases.

666

667 Fig. 6 PCN/CTX-induced StkP phosphorylation and PhpP-caused StkP-dephosphorylation.

668 (A). Growth curves of the  $\Delta$ *phpP* mutants and wild-type strains in TH broth, determined by  
669 spectrophotometry. Bars show the means  $\pm$  SD of three independent experiments.

670 (B). Schematic diagram of PCR and sequencing results of the  $\Delta$ *phpP* mutants.

671 (C). PhpP absence in the  $\Delta$ *phpP* mutants, determined by Western Blot assay. Lanes 1-4:  
672 immunoblotting bands of PhpP proteins from the wild-type *S. pneumoniae* strain ATCC 6306  
673 and *S. pneumoniae* isolates SP1, SP5 and SP9. Lanes 5-8: no immunoblotting bands of PhpP  
674 proteins in the  $\Delta$ *phpP* mutants.

675 (D) Sublethal PCN-induced increase of StkP phosphorylation and decrease of StkP  
676 phosphorylation in the  $\Delta$ *phpP* mutants, detected by spectrophotometry. Bars show the means  
677  $\pm$  SD of three independent experiments. \*:  $p < 0.05$  vs the StkP phosphorylation levels of the  
678 PCN-untreated wild-type strains and  $\Delta$ *phpP* mutants. #:  $p < 0.05$  vs the StkP phosphorylation  
679 levels of the wild-type strains.

680 (E) Sublethal CTX-induced increase of StkP phosphorylation and decrease of StkP  
681 phosphorylation in the  $\Delta$ *phpP* mutants, detected by spectrophotometry. The legend is the  
682 same as shown in D but for detection of CTX-induced StkP phosphorylation.

683

684 Table 1. Sequences of primers used in this study.

| Primer | Sequence (5' to 3')                                                                                | Purpose                                    | Size (bp) |
|--------|----------------------------------------------------------------------------------------------------|--------------------------------------------|-----------|
| P-1    | F: CTTCTGCCTSCTTCTGGTGT<br>R: TATTGGTGATTTCGCGTATC                                                 | <i>phpP</i> -mRNA detection                | 119       |
| S-1    | F: TCGCTCGGTTTCAGAGATGTATGT<br>R: TGGGTTTTTGGATTGATTTGTGTTT                                        | <i>stkP</i> -mRNA detection                | 190       |
| 16S    | F: CGACGATACATAGCCGACCTG<br>R: AAAACCTTCTTCACTCACGCG                                               | 16S RNA segment as qRT-PCR inner reference | 145       |
| P-2    | F: CGCC <u>CATATG</u> (Nde I)GAAATTTTCATTATTA<br>R: CGCCTCGAG(Xho I)TTCTGCATCCTCCTCGTTC            | <i>phpP</i> gene detection and expression  | 738       |
| S-2    | F: GCGC <u>CATATG</u> (Nde I)ATCCAAATCGGCAAG<br>R: GCGA <u>AAGCTT</u> (Hind III)AGGAGTAGCTGAAGTTGT | <i>stkP</i> gene detection and expression  | 1977      |
| P-3    | F: CGCCTCGAG(Xho I)ATATCGCTAGTGAAATGG<br>R: CGCGGATCC(BamH I)CACTGGTTACAATATCAC                    | <i>phpP</i> gene segment for knockout      | 495       |
| P-4    | F: ACATGAATGTAAGGATATCATG<br>R: GGATGTGCTGCAAGGCGATTA                                              | $\Delta$ <i>phpP</i> mutant identification | 895       |
| P-5    | F: GCTTTCTTCATTAGAATCAATCC<br>R: TCACTGCCACTTCTTCCCCATC                                            | $\Delta$ <i>phpP</i> mutant identification | 907       |

685 F: forward primer. R: reverse primer. Underlined areas indicate the sites of endonucleases.

686

687 Table 2 MICs of PCN and CTX against *S. pneumoniae* strains.

| Strain                     | MIC ( $\mu$ g/ml) |      |
|----------------------------|-------------------|------|
|                            | PCN               | CTX  |
| Wild-type ATCC6306         | 0.05              | 0.12 |
| $\Delta$ <i>phpP</i> -6306 | 8                 | 8    |
| Wild-type SP5              | 0.05              | 0.25 |
| $\Delta$ <i>phpP</i> -SP5  | 8                 | 16   |
| Wild-type SP9              | 0.25              | 0.5  |
| $\Delta$ <i>phpP</i> -SP9  | 16                | 16   |
| Wild-type SP14             | 0.02              | 0.03 |
| $\Delta$ <i>phpP</i> -SP14 | 4                 | 4    |

688

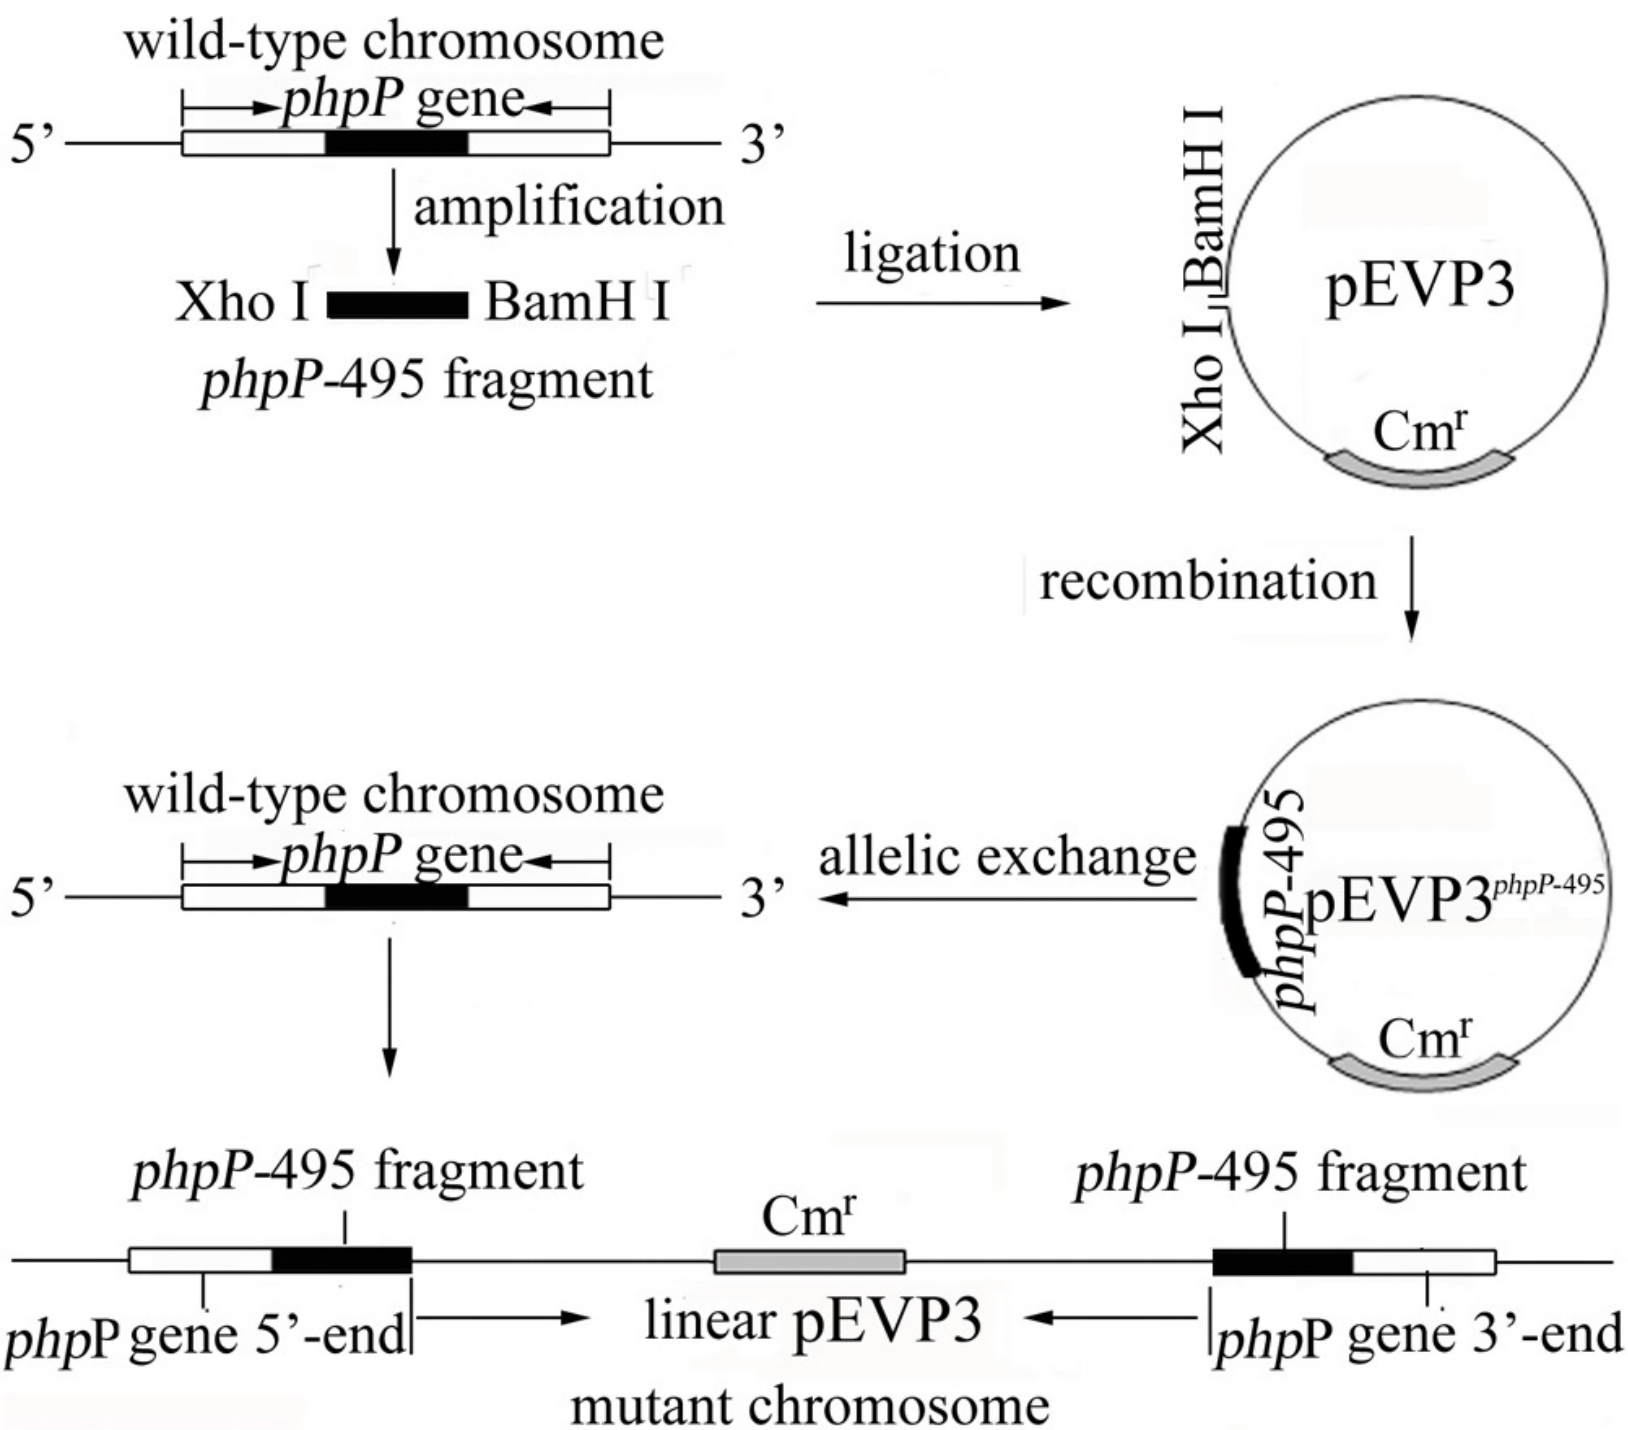

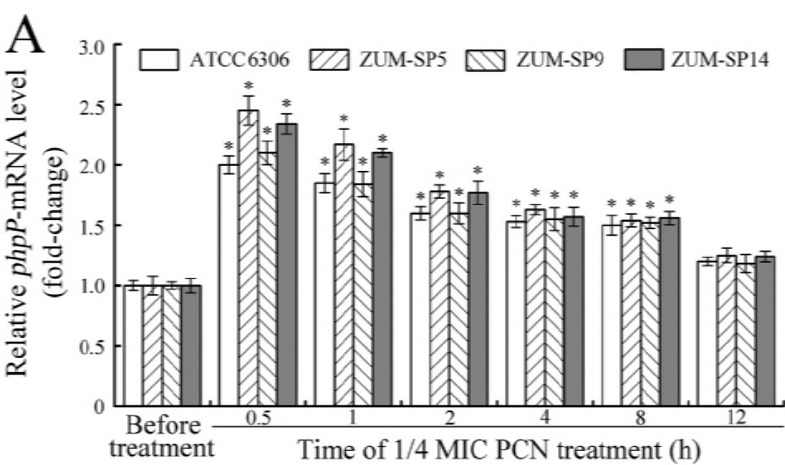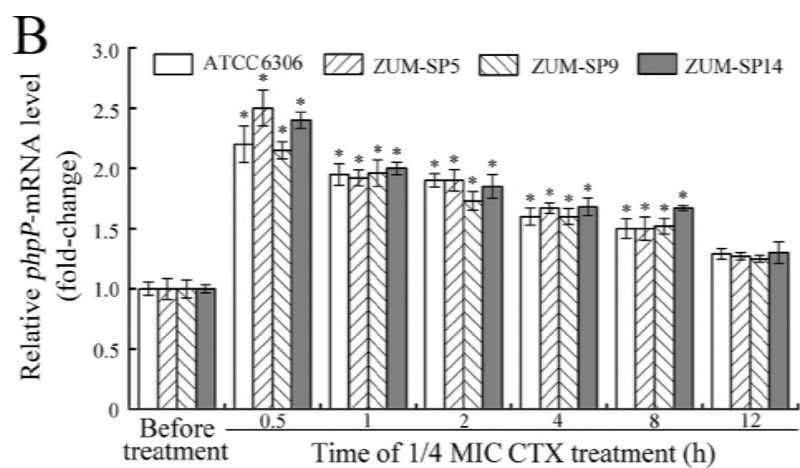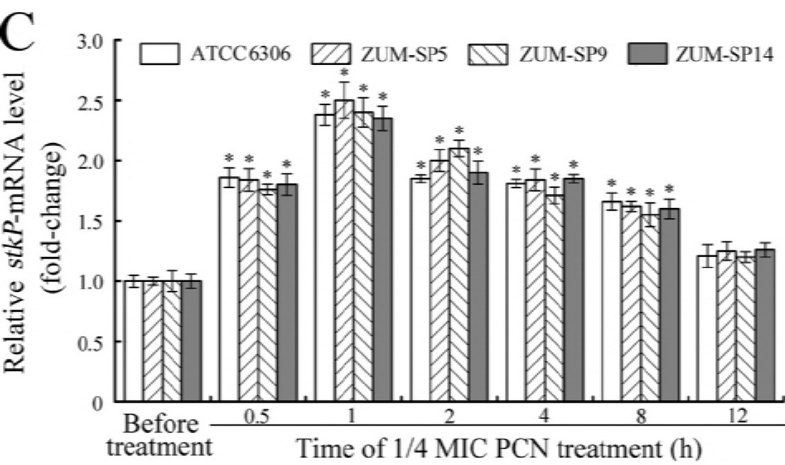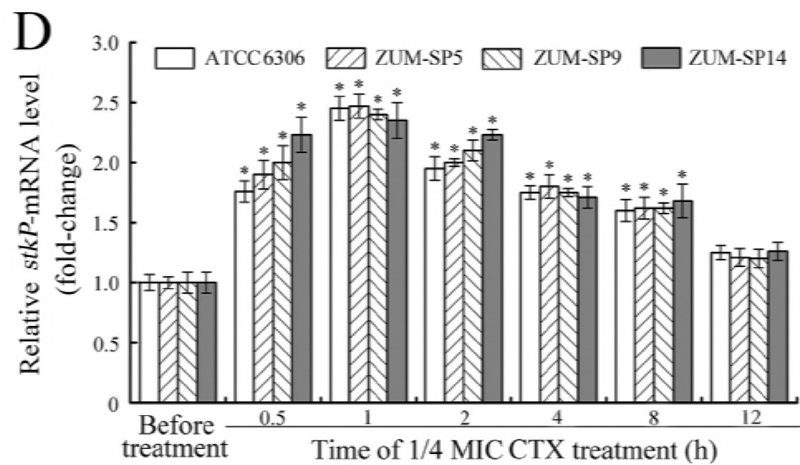

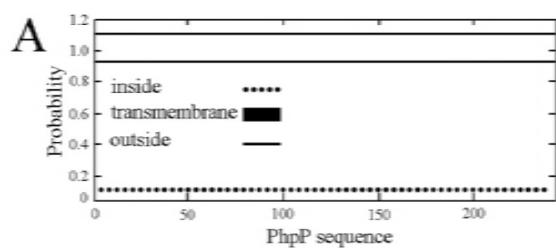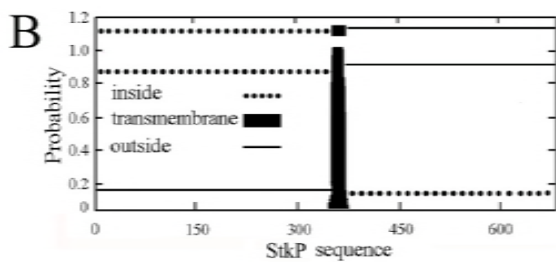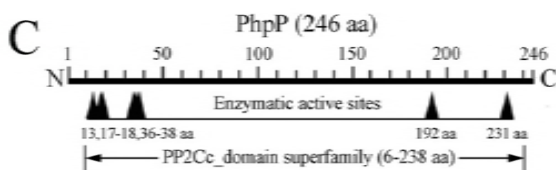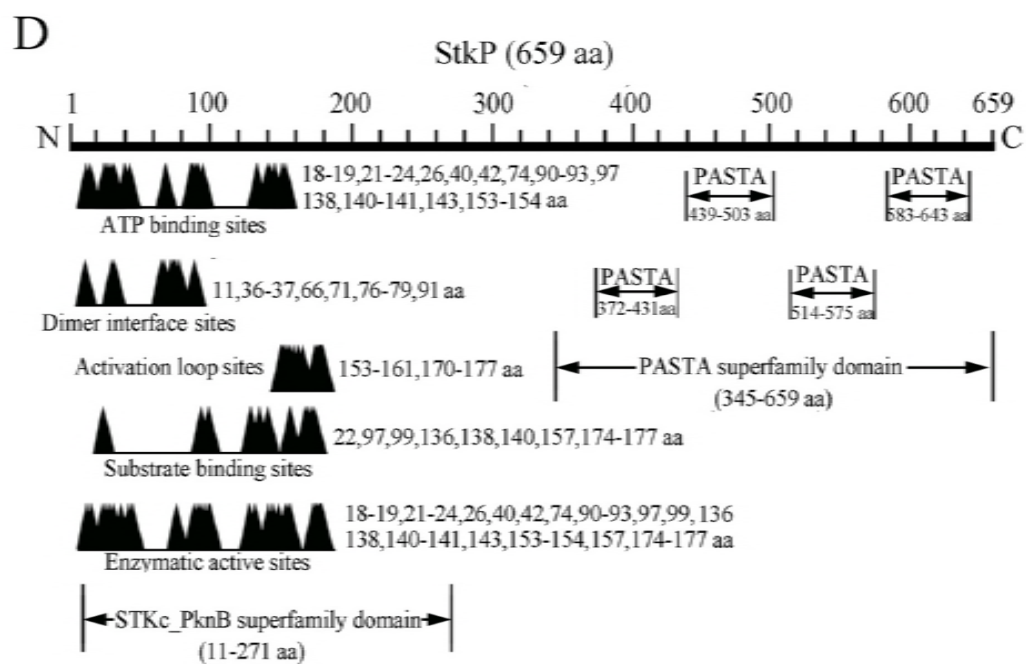

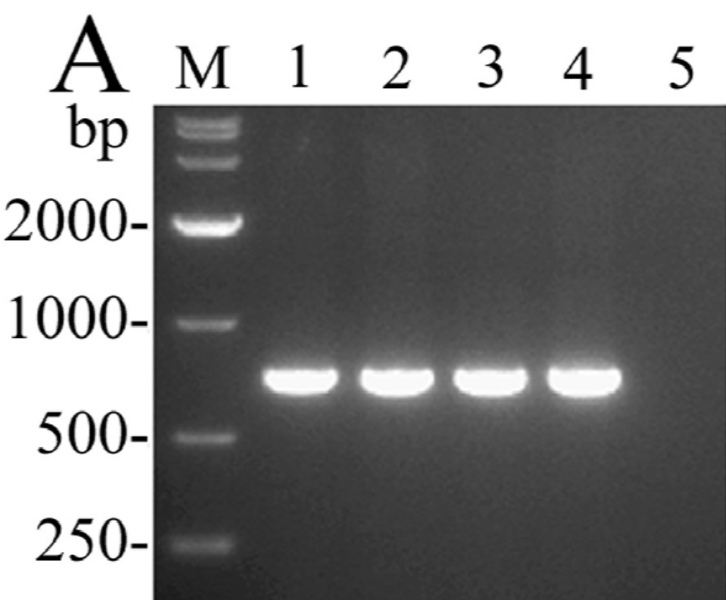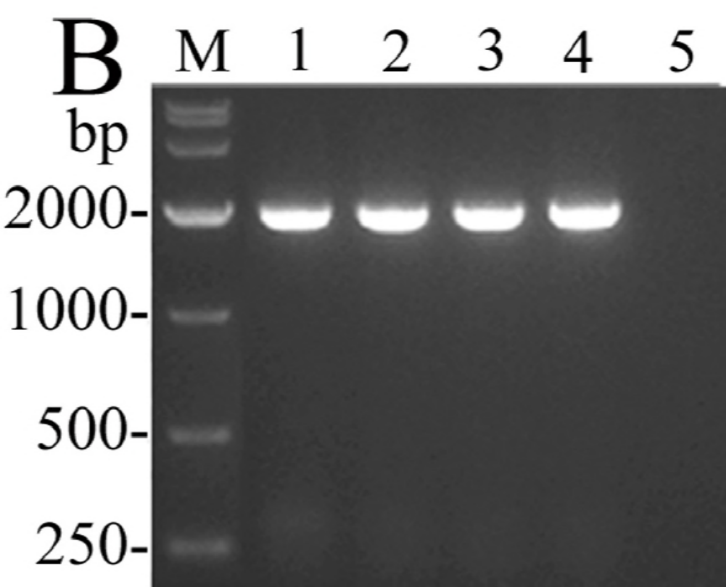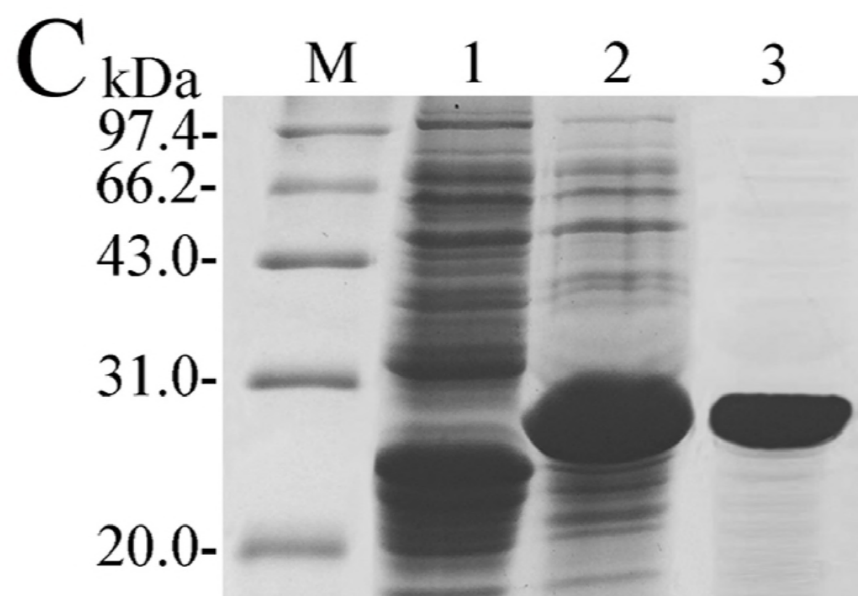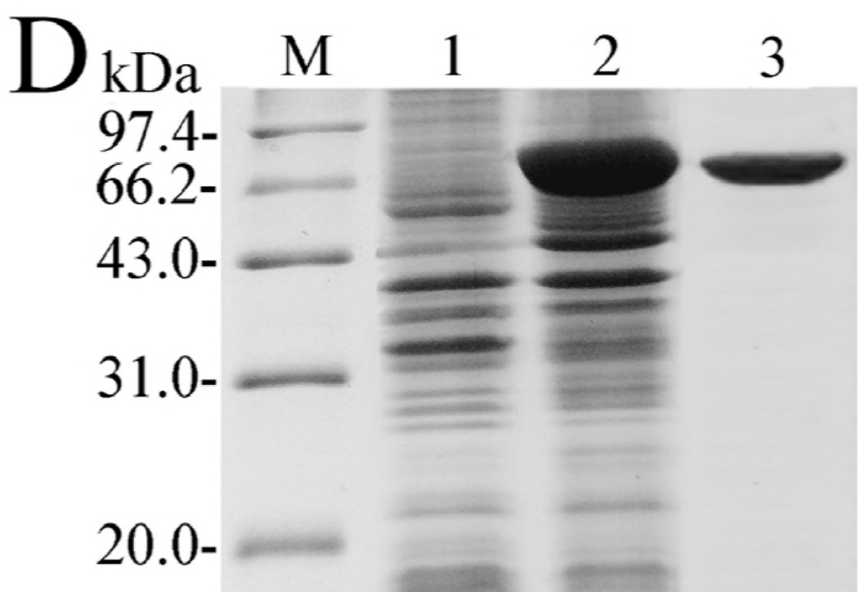

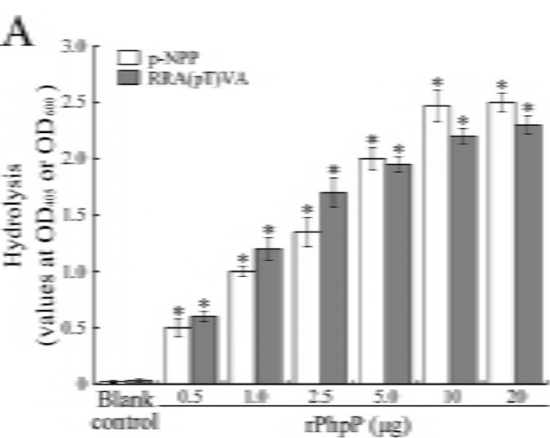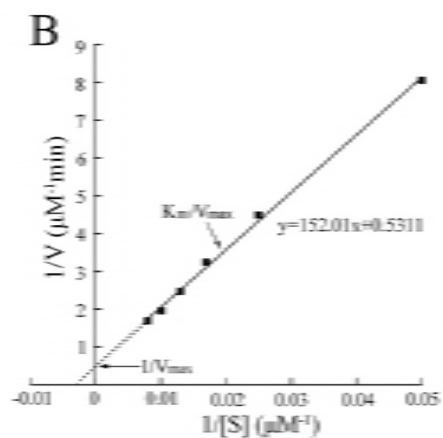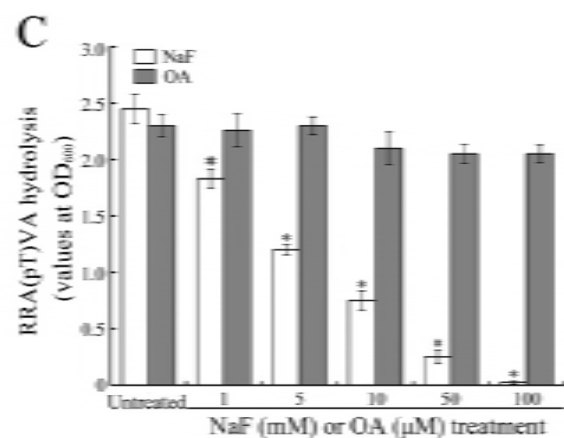

**A**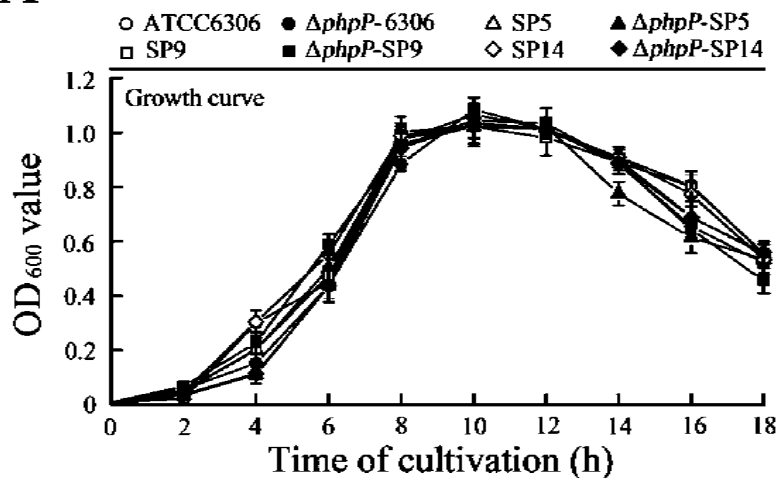**B**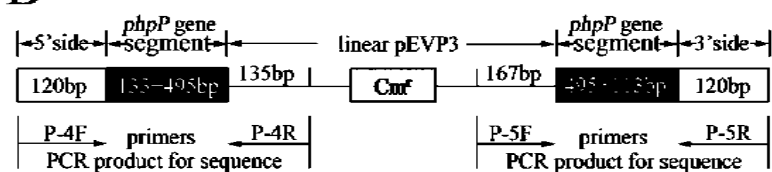**C**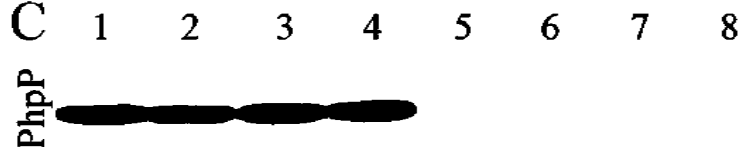**D**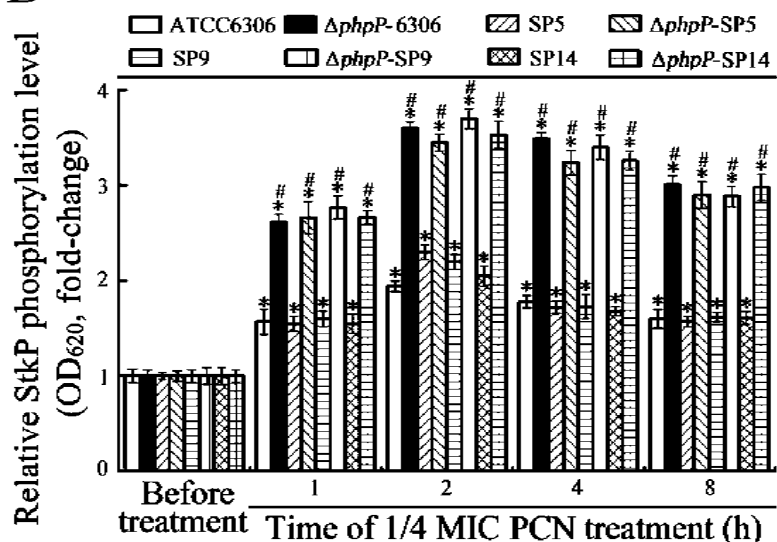**E**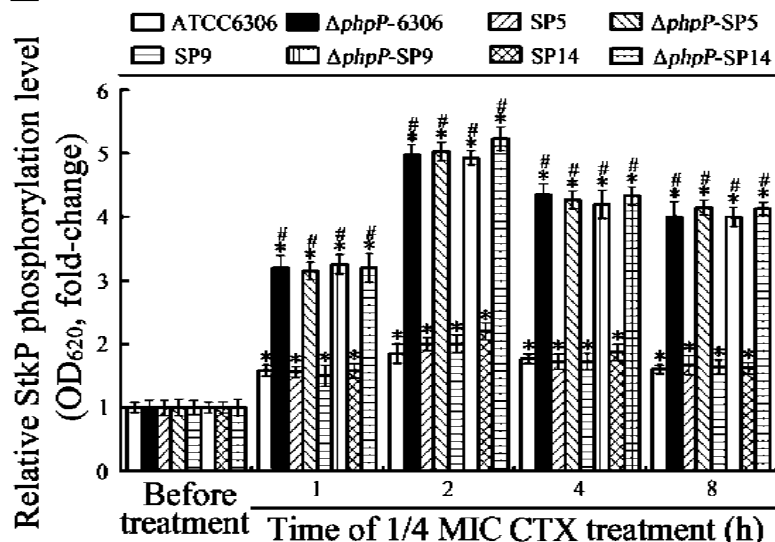

Source: https://www.biorxiv.org/content/10.1101/342188v1.full.pdf
